# Supplementary material for: Mechanisms Involved in the Functional Divergence of Duplicated GroEL Chaperonins in Myxococcus xanthus DK1622
Source: PLOS journal article supplement (doi:10.1371/journal.pgen.1003306), 2013-02-21
Supplement: S6 (10.1371/journal.pgen.1003306.s006) [file journal.pgen.1003306.s006]

**Table S1. Bacterial strains and plasmids used in this study**

| Strain and plasmid            | Genotype or description                                                              | Source or reference               |
|-------------------------------|--------------------------------------------------------------------------------------|-----------------------------------|
| <b>Strains</b>                |                                                                                      |                                   |
| <i>M. Xanthus</i><br>DK1622   | Wild-type strain                                                                     | Kaiser <i>et al.</i> (1979)       |
| YL0301                        | DK1622 $\Delta$ MXAN_4895 ( <i>groEL1</i> deletion)                                  | Lj <i>et al.</i> (2010)           |
| YL0302                        | DK1622 $\Delta$ MXAN_4467 ( <i>groEL2</i> deletion)                                  | Lj <i>et al.</i> (2010)           |
| YL0901                        | YL0301:: pSWU- <i>groEL1</i> ( <i>groEL1</i> integrated at <i>attB</i> site)         | This study                        |
| YL0902                        | YL0301:: pSWU- <i>groEL2</i> ( <i>groEL2</i> integrated at <i>attB</i> site)         | This study                        |
| YL0903                        | YL0301:: pSWU- <i>groEL2</i> -equatorial-N <sub><i>groEL1</i></sub>                  | This study                        |
| YL0904                        | YL0301:: pSWU- <i>groEL2</i> –apical <sub><i>groEL1</i></sub>                        | This study                        |
| YL0905                        | YL0301:: pSWU- <i>groEL2</i> -equatorial-C <sub><i>groEL1</i></sub>                  | This study                        |
| YL0906                        | YL0302:: pSWU- <i>groEL1</i>                                                         | This study                        |
| YL0907                        | YL0302:: pSWU- <i>groEL2</i>                                                         | This study                        |
| YL0908                        | YL0302:: pSWU- <i>groEL1</i> -equatorial-N <sub><i>groEL2</i></sub>                  | This study                        |
| YL0909                        | YL0302:: pSWU- <i>groEL1</i> -apical <sub><i>groEL2A</i></sub>                       | This study                        |
| YL0910                        | YL0302:: pSWU- <i>groEL1</i> -equatorial-C <sub><i>groEL2</i></sub>                  | This study                        |
| YL0911                        | DK1622:: pZC4895 ( <i>lacZ</i> fused to <i>groEL1</i> )                              | This study                        |
| YL0912                        | DK1622:: pZC4467 ( <i>lacZ</i> fused to <i>groEL2</i> )                              | This study                        |
| YL0913                        | YL0301:: pZC4467 ( <i>lacZ</i> fused to <i>groEL2</i> )                              | This study                        |
| YL0914                        | YL0901:: pZC4895 ( <i>lacZ</i> fused to <i>groEL1</i> )                              | This study                        |
| YL0915                        | YL0901:: pZC4467 ( <i>lacZ</i> fused to <i>groEL2</i> )                              | This study                        |
| YL0916                        | YL0902:: pZC4467 ( <i>lacZ</i> fused to <i>groEL2</i> )                              | This study                        |
| YL1001                        | DK1622 $\Delta$ GGM repeat of GroEL1 (GGM repeat deletion)                           | This study                        |
| YL1002                        | DK1622 $\Delta$ the last 3 GGM of GroEL1 (the last 3 GGM substitution)               | This study                        |
| <i>E. coli</i>                |                                                                                      |                                   |
| DH5 $\alpha$ ( $\lambda$ pir) | f80 <i>lacZ_M15_lacU169 recA1 endA1 hsdR17 supE44 thi-1 gyrA relA1</i> $\lambda$ pir | H. B. Kaplan, University of Texas |

|                                            |                                                                                                                                                                                       |                                                                 |
|--------------------------------------------|---------------------------------------------------------------------------------------------------------------------------------------------------------------------------------------|-----------------------------------------------------------------|
| BL21(DE3)                                  | $F'ompT hsdS_B (r_B^- m_B^-) gal dcm$                                                                                                                                                 | Stratagene                                                      |
| XL1-Blue MR                                | $\Delta(mcrA)183\Delta(mcrCB-hsdSMR-mrr)173 endA1 supE44 thi-1 recA1 gyrA96 relA1 lac$                                                                                                | Stratagene                                                      |
| <b>Plasmids</b>                            |                                                                                                                                                                                       |                                                                 |
| pSWU30                                     | Site-specific integration vector with Mx8 attB integration site; Tet <sup>r</sup>                                                                                                     | Tâm Mignot, CNRS (Centre national de la recherche scientifique) |
| pSWU-groEL1                                | groEL1 was ligated with pSWU30. Tet <sup>r</sup>                                                                                                                                      | This study                                                      |
| pSWU-groEL2                                | groEL2 was ligated with pSWU30. Tet <sup>r</sup>                                                                                                                                      | This study                                                      |
| pSWU-groEL2-equatorial-N <sub>groEL1</sub> | Equatorial-N region belong to GroEL1 and the other regions belong to GroEL2. The two fragments were fused and the fused fragment was ligated with pSWU30. Tet <sup>r</sup>            | This study                                                      |
| pSWU-groEL1-equatorial-N <sub>groEL2</sub> | Equatorial-N region belong to GroEL2 and the other region belong to GroEL1. The two fragments were fused and the fused fragment was ligated with pSWU30. Tet <sup>r</sup>             | This study                                                      |
| pSWU-groEL2-apical <sub>groEL1</sub>       | Apical region belong to GroEL1 and the other region belong to GroEL2. the two fragments were fused and the fused fragment was ligated with pSWU30. Tet <sup>r</sup>                   | This study                                                      |
| pSWU-groEL1-apical <sub>groEL2</sub>       | Apical region belong to GroEL2 and the other region belong to GroEL1. the two fragments were fused and the fused fragment was ligated with pSWU30. Tet <sup>r</sup>                   | This study                                                      |
| pSWU-groEL2-equatorial-C <sub>groEL1</sub> | Equatorial-C region belong to GroEL1 and the other region belong to GroEL2. The two fragments were fused and the fused fragment was ligated with pSWU30. Tet <sup>r</sup>             | This study                                                      |
| pSWU-groEL1-equatorial-C <sub>groEL2</sub> | Equatorial-C region belong to GroEL2 and the other region belong to GroEL1. The two fragments were fused and the fused fragment was ligated with pSWU30. Tet <sup>r</sup>             | This study                                                      |
| pZCY11                                     | 1.56-kb HindIII/EcoRI fragment from pSL1180-Km, blunted with Klenow fragment and ligated with 4.57-kb T4 polymerase-blunted KpnI fragment from pMiniHimar1-lacZ, Km <sup>r</sup> lacZ | Lj <i>et al.</i> (2010)                                         |
| pZC4895                                    | 735-bp fragment of DK1622 MXAN_4895, containing a stop codon, inserted into SpeI/KpnI sites of pZCY11, Km <sup>r</sup> lacZ                                                           | This study                                                      |
| pZC4467                                    | 601-bp fragment of DK1622 MXAN_4467, containing a stop codon, inserted into SpeI/KpnI sites of pZCY11, Km <sup>r</sup> lacZ                                                           | This study                                                      |
